# Supplementary material for: Epidemiologic Factors, Clinical Presentation, Causes, and Outcomes of Liver Abscess: A 35-Year Olmsted County Study
Source: PubMed Central journal article supplement — Mayo Clin Proc Innov Qual Outcomes. 2018 Feb 22;2(1):16–25. doi: 10.1016/j.mayocpiqo.2018.01.002 (PMC6124335; doi:10.1016/j.mayocpiqo.2018.01.002), 2018-02-22
Supplement: mmc2.pdf [file mmc2.pdf]

## SUPPLEMENTARY TABLES

**Supplementary Table 1.** Frequency of Presenting Clinical Features of Patients With Pyogenic Liver Abscess

| Clinical Feature <sup>a</sup> | Total (N=72) | Period              |                     | P Value |
|-------------------------------|--------------|---------------------|---------------------|---------|
|                               |              | 1980-2000<br>(n=26) | 2001-2014<br>(n=46) |         |
| <b>Symptoms</b>               |              |                     |                     |         |
| Fever                         | 63 (87.5)    | 25 (96.2)           | 38 (82.6)           | .10     |
| Chills                        | 53 (73.6)    | 23 (88.5)           | 30 (65.2)           | .03     |
| Abdominal pain                | 38 (52.8)    | 16 (61.5)           | 22 (47.8)           | .26     |
| Malaise/fatigue               | 42 (58.3)    | 17 (65.4)           | 25 (54.3)           | .36     |
| Weight loss                   | 20 (27.8)    | 8 (30.8)            | 12 (26.1)           | .67     |
| Nausea                        | 23 (31.9)    | 11 (42.3)           | 12 (26.1)           | .16     |
| Vomiting                      | 15 (20.8)    | 7 (26.9)            | 8 (17.4)            | .34     |
| Decreased appetite            | 14 (19.4)    | 3 (11.5)            | 11 (23.9)           | .20     |
| Jaundice                      | 9 (12.5)     | 4 (15.4)            | 5 (10.9)            | .58     |
| Myalgias                      | 12 (16.7)    | 4 (15.4)            | 8 (17.4)            | .83     |
| Cough                         | 10 (13.9)    | 5 (19.2)            | 5 (10.9)            | .32     |
| Shortness of breath           | 8 (11.1)     | 3 (11.5)            | 5 (10.9)            | .93     |
| Headache                      | 8 (11.1)     | 1 (3.8)             | 7 (15.2)            | .14     |
| Diarrhea                      | 5 (6.9)      | 4 (15.4)            | 1 (2.2)             | .03     |
| <b>Signs</b>                  |              |                     |                     |         |
| Hyperpyrexia                  | 60 (83.3)    | 24 (92.3)           | 36 (78.3)           | .12     |

|                         |           |           |           |      |
|-------------------------|-----------|-----------|-----------|------|
| Abdominal<br>tenderness | 37 (51.4) | 14 (53.8) | 23 (50.0) | .75  |
| Hepatomegaly            | 11 (15.3) | 8 (30.8)  | 3 (6.5)   | .006 |
| Icterus                 | 10 (13.9) | 4 (15.4)  | 6 (13.0)  | .78  |
| Altered mental status   | 9 (12.5)  | 4 (15.4)  | 5 (10.9)  | .58  |

---

<sup>a</sup> Values are presented as number and percentage of patients.

**Supplementary Table 2.** Microbiologic Findings of Cultures (Liver and Blood) From Patients With Pyogenic Liver Abscess Between 1980 and 2014

| Organism <sup>a</sup>          | Total<br>(n=61) | Period              |                     | P Value |
|--------------------------------|-----------------|---------------------|---------------------|---------|
|                                |                 | 1980-2000<br>(n=23) | 2001-2014<br>(n=38) |         |
| Gram-positive cocci            |                 |                     |                     |         |
| <i>Streptococcus milleri</i> * | 32 (52.5)       | 14 (60.9)           | 18 (47.4)           | .43     |
| <i>Staphylococcus aureus</i>   | 6 (9.8)         | 3 (13.0)            | 3 (7.9)             | .66     |
| Other <sup>b</sup>             | 2 (3.3)         | 0 (0)               | 2 (5.3)             | .52     |
| Gram-positive rods             |                 |                     |                     |         |
| <i>Clostridium</i>             | 2 (3.3)         | 1 (4.3)             | 1 (2.6)             | >.99    |
| <i>Lactobacillus</i>           | 1 (1.6)         | 1 (4.3)             | 0 (0)               | .38     |
| Other <sup>c</sup>             | 2 (3.3)         | 0 (0)               | 2 (5.3)             | .52     |
| Gram-negative rods             |                 |                     |                     |         |
| <i>Escherichia coli</i>        | 10 (16.4)       | 3 (13.0)            | 7 (18.4)            | .73     |
| <i>Klebsiella</i>              | 15 (24.6)       | 5 (21.7)            | 10 (26.3)           | .77     |
| <i>Fusobacterium</i>           | 5 (8.2)         | 2 (8.7)             | 3 (7.9)             | >.99    |
| <i>Bacteroides</i>             | 5 (8.2)         | 1 (4.3)             | 4 (10.5)            | .64     |
| Other <sup>d</sup>             | 7 (11.5)        | 3 (13.0)            | 4 (10.5)            | >.99    |
| <i>Candida</i>                 | 4 (6.6)         | 2 (8.7)             | 2 (5.3)             | .63     |

<sup>a</sup> Values are presented as number and percentage of patients unless specified otherwise.

<sup>b</sup> Indicates *Parvimonas micra* and *Peptostreptococcus*.

<sup>c</sup> Indicates *Propionibacterium granulosum* and *Listeria*.

<sup>d</sup> Indicates *Morganella morganii*, *Proteus*, *Serratia marcescens*, *Pseudomonas*, *Enterobacter*, *Citrobacter freundii*, and *Campylobacter*.

\*One patient had isolate of streptococcus group D
