# Supplementary figures and images for: Epidemiologic Factors, Clinical Presentation, Causes, and Outcomes of Liver Abscess: A 35-Year Olmsted County Study
Source: PubMed Central journal article supplement — Mayo Clin Proc Innov Qual Outcomes. 2018 Feb 22;2(1):16–25. doi: 10.1016/j.mayocpiqo.2018.01.002 (PMC6124335; doi:10.1016/j.mayocpiqo.2018.01.002), 2018-02-22

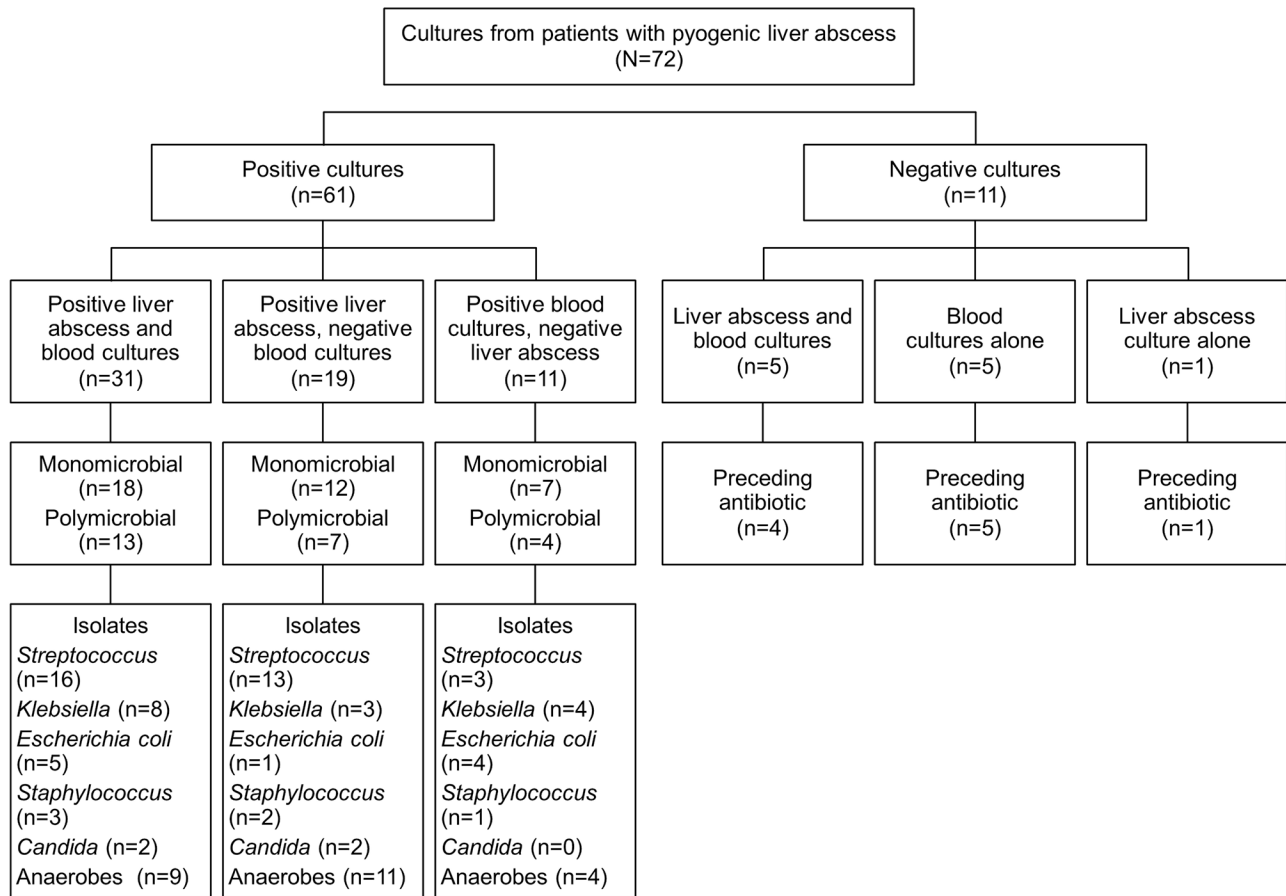

Supplement: mmc1.pdf [file mmc1.pdf]
